# Supplementary material
Source: PubMed Central journal article supplement (PMC3327462)
Supplement: supp_blood-2011-10-388538_blood-2011-10-388538-1.pdf [file supp_blood-2011-10-388538_blood-2011-10-388538-1.pdf]

## Supplemental Figure : S1

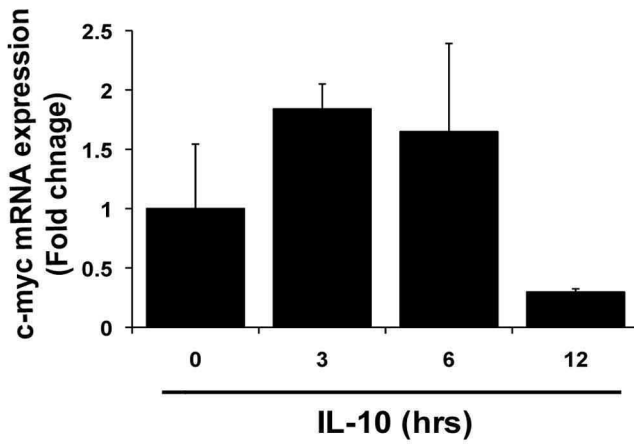

**S1:** Serum starved Ly10 cells were treated with rIL-10 and c-myc expression was assessed by Q-RT-PCR

## Supplemental Fig: S2

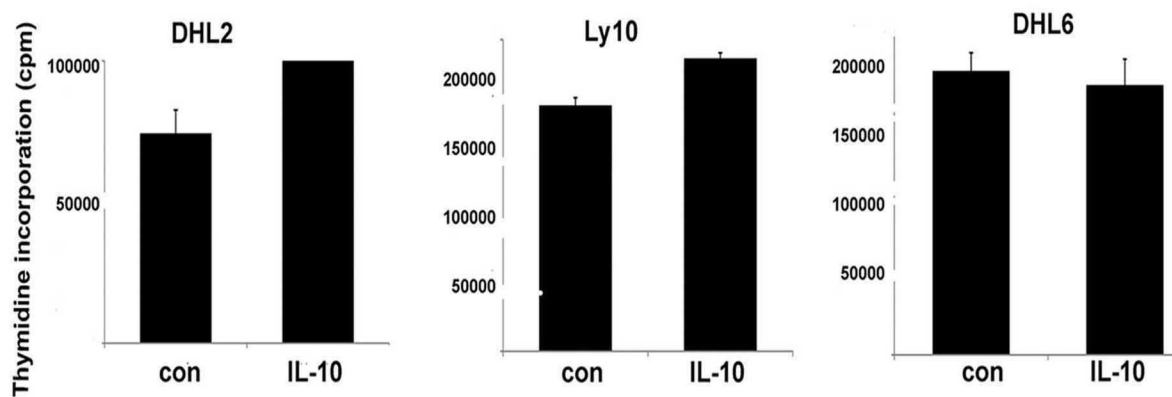

**S2:** Serum starved pJAK2 + (DHL2 and Ly10) and pJAK2- (DHL6) DLBCL lines were treated with rIL-10 (100ng/ml) for 72 hrs and proliferation was assessed by thymidine incorporation assay as described before<sup>16</sup>

### Supplemental Fig: S3

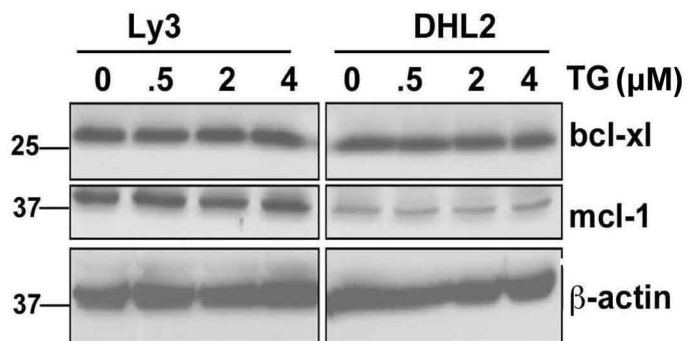

**S3:** Ly3 and DHL2 cells were treated with various concentrations of TG and protein expression of bcl-xl and mcl-1 was assessed by immunoblotting.
